# Supplementary material
Source: PubMed Central journal article supplement (PMC2441683)
Supplement: E07-11-1199_1.pdf [file E07-11-1199_1.pdf]

| Kinase       | GO Cell Component       | Kinase       | GO Cell Component         | Kinase         | GO Cell Component        |
|--------------|-------------------------|--------------|---------------------------|----------------|--------------------------|
| <i>AKL1</i>  | cyto., bud neck         | <i>KIN1</i>  | PM                        | <i>SKM1</i>    | PM                       |
| <i>ATG1</i>  | PAS                     | <i>KIN2</i>  | PM                        | <i>SKS1</i>    | cyto.                    |
| <i>ARK1</i>  | actin cortical patch    | <i>KIN3</i>  | unknown                   | <i>SKY1</i>    | cyto.                    |
| <i>BCK1</i>  | intracellular           | <i>KIN4</i>  | bud neck, SPB, cortex     | <i>SLN1</i>    | PM                       |
| <i>BCY1</i>  | cyto., nucl., PM        | <i>KIN28</i> | TFIIH complex             | <i>SLT2</i>    | nucl., bud tip           |
| <i>BUB1</i>  | nucl., kinetochore      | <i>KIN82</i> | unknown                   | <i>SMK1</i>    | mitochondrion            |
| <i>BUD32</i> | cyto., nucl.            | <i>KKQ8</i>  | cyto.                     | <i>SNF1</i>    | cyto., nucl., vacuole    |
| <i>CAK1</i>  | cyto.                   | <i>KNS1</i>  | unknown                   | <i>SPS1</i>    | cyto., nucl.             |
| <i>CBK1</i>  | nucl., bud neck / tip   | <i>KSP1</i>  | nucl.                     | <i>SSK2</i>    | cyto., bud neck / tip    |
| <i>CDC5</i>  | nucl., SPB, bud neck    | <i>KSS1</i>  | nucl.                     | <i>SSK22</i>   | unknown                  |
| <i>CDC7</i>  | nucl.                   | <i>MCK1</i>  | cyto., nucl.              | <i>SSN3</i>    | txn factor complex       |
| <i>CDC15</i> | bud neck, SPB           | <i>MEC1</i>  | nucl.                     | <i>STE7</i>    | cyto., shmoo tip         |
| <i>CDC28</i> | cyto., nucl.            | <i>MEK1</i>  | nucl.                     | <i>STE11</i>   | cyto.                    |
| <i>CHK1</i>  | nucl.                   | <i>MKK1</i>  | bud tip                   | <i>STE20</i>   | incipient bud, shmoo tip |
| <i>CKA1</i>  | CK2 complex             | <i>MKK2</i>  | cyto.                     | <i>SWE1</i>    | nucl., bud neck          |
| <i>CKA2</i>  | CK2 complex             | <i>MLP1</i>  | nucl.                     | <i>TEL1</i>    | nucl., mitochondrion     |
| <i>CLA4</i>  | actin cap               | <i>MPS1</i>  | SPB, kinetochore          | <i>TOR1</i>    | Golgi, PM, vacuole mem.  |
| <i>CMK1</i>  | cyto.                   | <i>MRK1</i>  | unknown                   | <i>TOR2</i>    | PM, vacuole membrane     |
| <i>CMK2</i>  | cyto.                   | <i>NPR1</i>  | cyto., Golgi body         | <i>TOS3</i>    | cyto.                    |
| <i>CTK1</i>  | nucl., CTD complex      | <i>PBS2</i>  | cyto., bud neck / tip     | <i>TPK1</i>    | cyto., nucl.             |
| <i>CTK2</i>  | CTD kinase complex      | <i>PHO85</i> | nucl.                     | <i>TPK2</i>    | cyto.                    |
| <i>CTK3</i>  | CTD kinase complex      | <i>PKC1</i>  | cyto., nucl., pol. growth | <i>TPK3</i>    | cyto., nucl.             |
| <i>DBF2</i>  | bud neck, SPB           | <i>PKH1</i>  | cyto.                     | <i>VHS1</i>    | cyto.                    |
| <i>DBF4</i>  | protein complex         | <i>PKH2</i>  | nucl.                     | <i>VPS15</i>   | Golgi body               |
| <i>DBF20</i> | cyto.                   | <i>PKH3</i>  | unknown                   | <i>VPS34</i>   | endosome                 |
| <i>DUN1</i>  | nucl.                   | <i>PRR1</i>  | cyto.                     | <i>YAK1</i>    | cyto., nucl.             |
| <i>ELM1</i>  | bud neck                | <i>PRR2</i>  | nucl.                     | <i>YBR028c</i> | cyto.                    |
| <i>FMP48</i> | mitochondrion           | <i>PSK1</i>  | cyto.                     | <i>YCK1</i>    | PM, ER                   |
| <i>FUS3</i>  | cyto., nucl., shmoo tip | <i>PSK2</i>  | cyto., mitochondrion      | <i>YCK2</i>    | bud neck, PM, shmoo      |
| <i>GCN2</i>  | cyto. ribosome          | <i>PTK1</i>  | unknown                   | <i>YCK3</i>    | nucl, vacuole mem., PM   |
| <i>GIN4</i>  | bud neck                | <i>PTK2</i>  | cyto., nucl., PM          | <i>YDL025c</i> | unknown                  |
| <i>HAL5</i>  | unknown                 | <i>RAD53</i> | nucl.                     | <i>YKG3</i>    | unknown                  |
| <i>HOG1</i>  | cyto., nucl.            | <i>RCK1</i>  | unknown                   | <i>YGL059w</i> | mitochondrion            |
| <i>HRK1</i>  | cyto.                   | <i>RCK2</i>  | cyto.                     | <i>YKL171w</i> | cyto.                    |
| <i>HRR25</i> | nucl., PM               | <i>RIM11</i> | cyto.                     | <i>YMR291w</i> | cyto., nucl.             |
| <i>HSL1</i>  | septin ring, bud neck   | <i>RIM15</i> | cyto., nucl.              | <i>YNR047w</i> | cyto.                    |
| <i>IME2</i>  | nucl.                   | <i>RIO1</i>  | cyto., nucl.              | <i>YPK1</i>    | cyto., PM, bud neck      |
| <i>IPL1</i>  | kinetochore MT, SPB     | <i>RIO2</i>  | cyto., nucl.              | <i>YPK2</i>    | nucl., cyto.             |
| <i>IRE1</i>  | nucl.                   | <i>SAK1</i>  | cyto.                     | <i>YPL141c</i> | cyto.                    |
| <i>ISR1</i>  | unknown                 | <i>SAT4</i>  | unknown                   | <i>YPL150w</i> | unknown                  |
| <i>KCC4</i>  | bud neck                | <i>SCH9</i>  | cyto., nucl., vacuole     | <i>YPL236c</i> | vacuole mem.             |
| <i>KIC1</i>  | cyto.                   | <i>SGV1</i>  | nucl.                     |                |                          |

Annotated Functions: ● Filamentous growth ● Mating (pheromone response) ● Cell cycle processes and related checkpoints

**Supplementary Figure SF1.** The yeast kinase complement, or kinome, is indicated, along with Gene Ontology terms describing the subcellular compartment to which each kinase has been localized in non-filamentous strains of yeast. Functions related to filamentous growth, mating, and cell cycle progression are color-coded alongside each kinase.

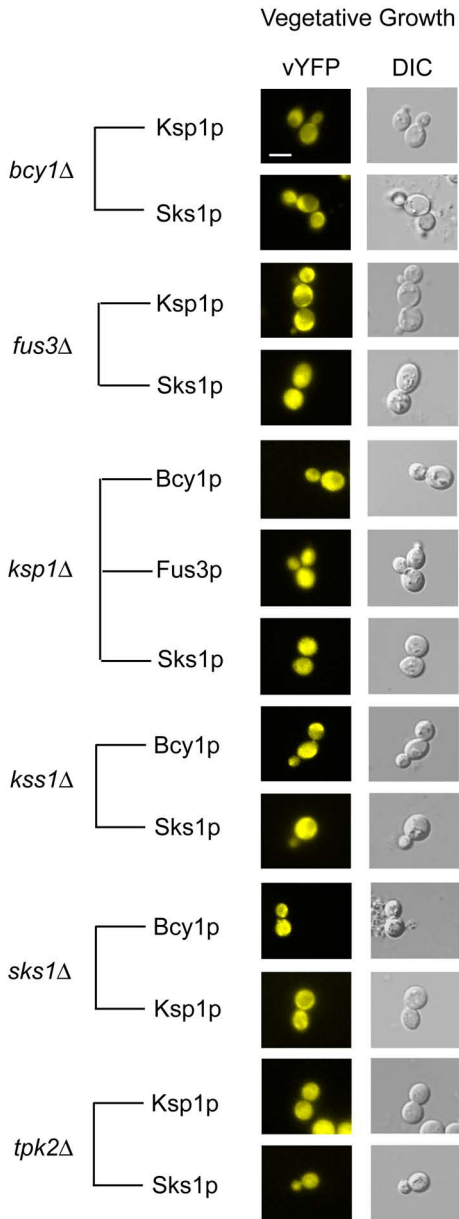

**Supplementary Figure SF2.** Subcellular distribution of kinase-vYFP chimeras in the indicated kinase deletion mutants under vegetative growth conditions. Yellow fluorescence and DIC images are presented. Scale bar, 3μm.

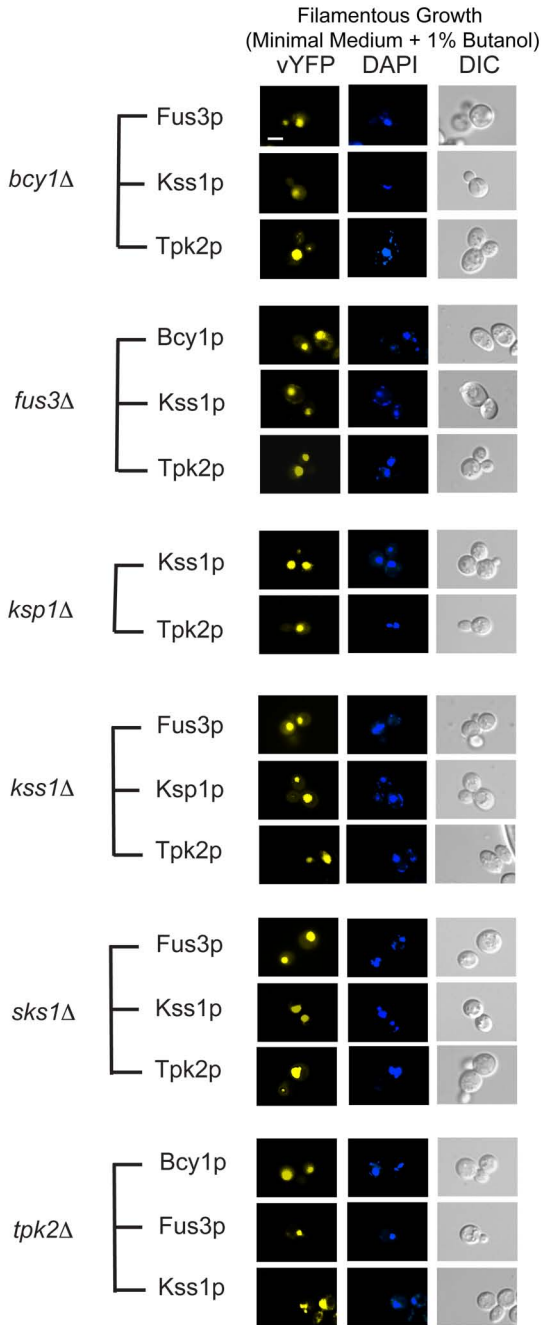

**Supplementary Figure SF3.** Nuclear-localized kinase-vYFP chimeras in the indicated deletion mutants. The images presented here identify nuclear shifts unaffected by the respective gene deletions. Yellow fluorescence and DIC images are shown. Scale bar, 3  $\mu$ m.

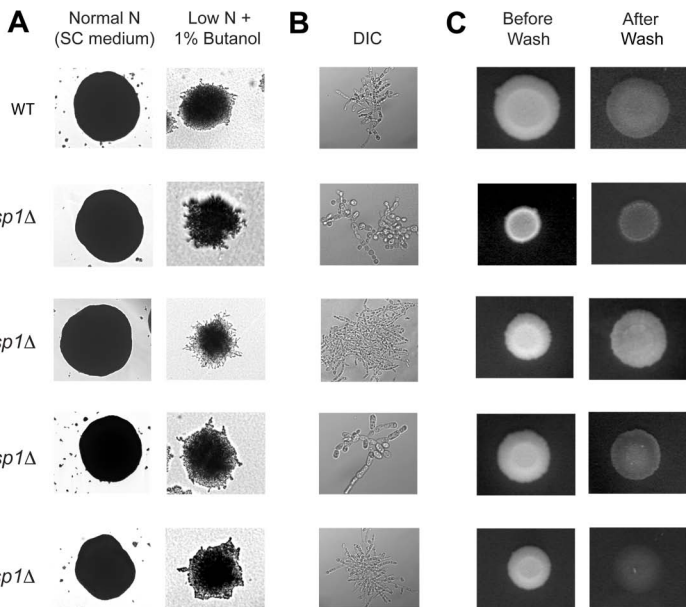

**Supplementary Figure SF4.** Filamentous growth phenotypes of the indicated double deletion mutants. Colony morphology was assessed on synthetic complete (SC) medium and on SLAD plates supplemented with 1% butanol. Cells from these colonies were scraped into water for differential interference contrast microscopy. Invasive growth was assayed on YPD medium; plates were washed after 5 days of growth.

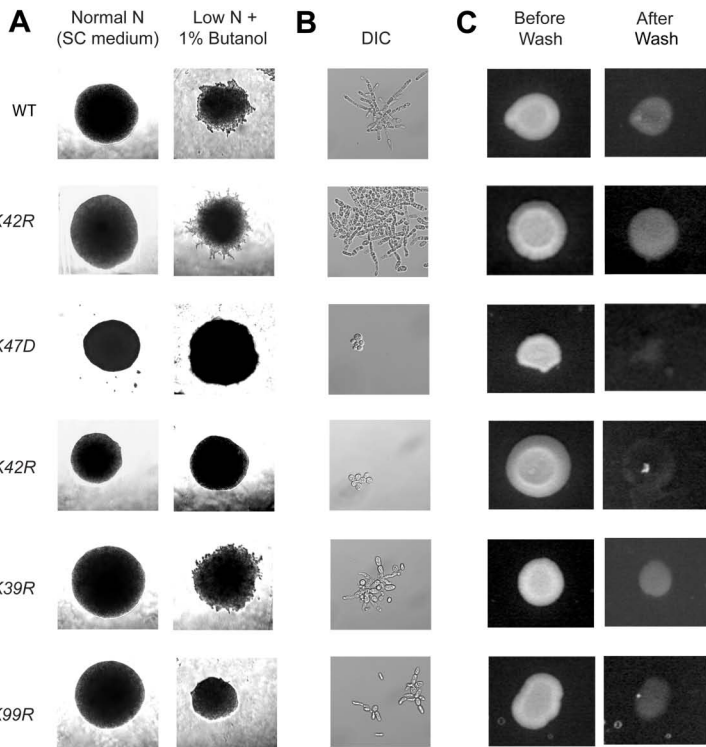

**Supplementary Figure SF5.** Filamentous growth phenotypes of kinase-dead mutants. Colony morphology was determined on SC medium (normal nitrogen levels) and on SLAD medium supplemented with 1% butanol. Cells were scraped from colonies for DIC microscopy. Invasive growth was assayed on SC –Ura medium; plates were washed after growth for 5 days.

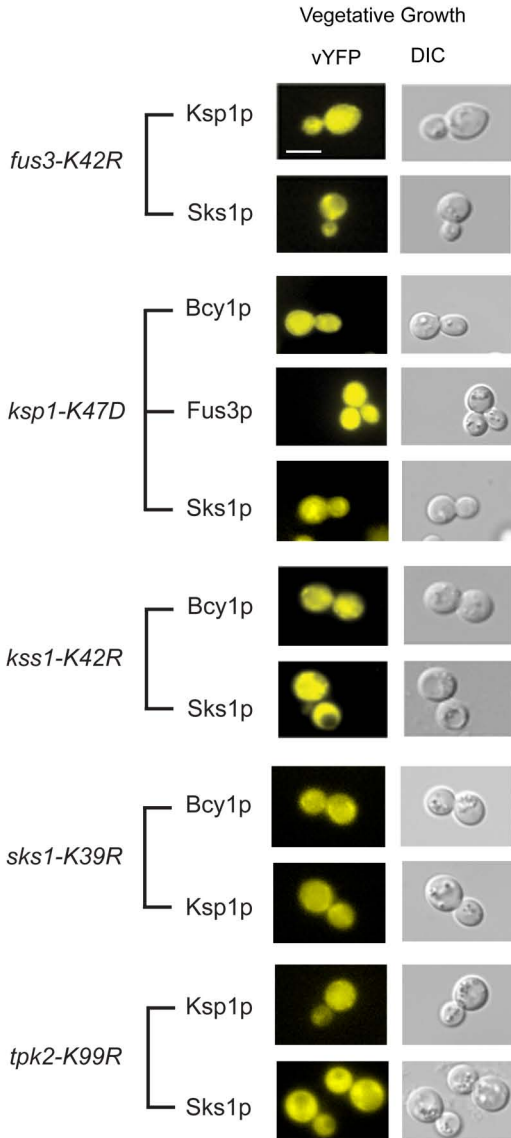

**Supplementary Figure SF6.** Subcellular distribution of kinase-vYFP chimeras in haploid yeast strains carrying the indicated kinase-dead alleles under vegetative growth conditions. Yellow fluorescence and DIC images are presented. Scale bar, 3  $\mu$ m.

**Supplementary Table ST1.** Kinase localization in haploid filamentous yeast (Y825)

| <b>Kinase</b> | <b>Vegetative Growth</b> | <b>Filamentous Growth<br/>(1%Butanol)</b> |
|---------------|--------------------------|-------------------------------------------|
| <i>AKL1</i>   | Cytoplasm                | Cytoplasm                                 |
| <i>ATG1</i>   | Cytoplasm                | Cytoplasm                                 |
| <i>ARK1</i>   | Punctate                 | Punctate                                  |
| <i>BCK1</i>   | Cytoplasm                | Cytoplasm                                 |
| <i>BCY1</i>   | Cytoplasm                | Nucleus                                   |
| <i>BUB1</i>   | Cytoplasm, Nucleus       | Cytoplasm, Nucleus                        |
| <i>BUD32</i>  | Cytoplasm, Nucleus       | Cytoplasm, Nucleus                        |
| <i>CAK1</i>   | Cytoplasm (faint)        | Cytoplasm (faint)                         |
| <i>CBK1</i>   | Cytoplasm                | Cytoplasm                                 |
| <i>CDC15</i>  | Cytoplasm                | Cytoplasm                                 |
| <i>CDC28</i>  | Cytoplasm                | Cytoplasm                                 |
| <i>CDC5</i>   | Cytoplasm (faint)        | Cytoplasm (faint)                         |
| <i>CDC7</i>   | Cytoplasm, Nucleus       | Cytoplasm, Nucleus                        |
| <i>CHK1</i>   | Cytoplasm                | Cytoplasm                                 |
| <i>CKA1</i>   | Cytoplasm, Nucleus       | Cytoplasm, Nucleus                        |
| <i>CKA2</i>   | Cytoplasm                | Cytoplasm                                 |
| <i>CLA4</i>   | Cytoplasm                | Cytoplasm                                 |
| <i>CMK1</i>   | Cytoplasm                | Cytoplasm                                 |
| <i>CMK2</i>   | Cytoplasm                | Cytoplasm                                 |
| <i>CTK1</i>   | Cytoplasm, Nucleus       | Cytoplasm, Nucleus                        |
| <i>CTK2</i>   | Nucleus                  | Nucleus                                   |
| <i>CTK3</i>   | Nucleus                  | Nucleus                                   |

| <b>Kinase</b> | <b>Vegetative Growth</b>         | <b>Filamentous Growth<br/>(1%Butanol)</b> |
|---------------|----------------------------------|-------------------------------------------|
| <i>DBF2</i>   | Cytoplasm                        | Cytoplasm                                 |
| <i>DBF20</i>  | Cytoplasm                        | Cytoplasm                                 |
| <i>DBF4</i>   | Cytoplasm, Nucleus               | Cytoplasm, Nucleus                        |
| <i>DUN1</i>   | Cytoplasm (faint)                | Cytoplasm (faint)                         |
| <i>ELM1</i>   | Cytoplasm (faint), Bud neck      | Cytoplasm (faint), Bud neck               |
| <i>FMP48</i>  | Mitochondrion, Cytoplasm (faint) | Mitochondrion, Cytoplasm (faint)          |
| <i>FUS3</i>   | Cytoplasm                        | Nucleus                                   |
| <i>GCN2</i>   | Cytoplasm                        | Cytoplasm                                 |
| <i>GIN4</i>   | Cytoplasm                        | Cytoplasm                                 |
| <i>HAL5</i>   | Cytoplasm (faint)                | Cytoplasm (faint)                         |
| <i>HOG1</i>   | Cytoplasm                        | Cytoplasm                                 |
| <i>HRK1</i>   | Cytoplasm                        | Cytoplasm                                 |
| <i>HRR25</i>  | Cytoplasm                        | Cytoplasm                                 |
| <i>HSL1</i>   | Bud neck                         | Bud neck                                  |
| <i>IME2</i>   | Cytoplasm (faint)                | Cytoplasm (faint)                         |
| <i>IPL1</i>   | Cytoplasm (faint)                | Cytoplasm (faint)                         |
| <i>IRE1</i>   | Cytoplasm (faint)                | Cytoplasm (faint)                         |
| <i>ISR1</i>   | Cytoplasm                        | Cytoplasm                                 |
| <i>KCC4</i>   | Bud, Cytoplasm                   | Bud, Cytoplasm                            |
| <i>KIC1</i>   | Cytoplasm                        | Cytoplasm                                 |
| <i>KIN1</i>   | Cytoplasm                        | Cytoplasm                                 |
| <i>KIN2</i>   | Cytoplasm (faint)                | Cytoplasm (faint)                         |
| <i>KIN28</i>  | Nucleus                          | Nucleus                                   |



| <b>Kinase</b> | <b>Vegetative Growth</b> | <b>Filamentous Growth<br/>(1%Butanol)</b> |
|---------------|--------------------------|-------------------------------------------|
| <i>KIN3</i>   | Cytoplasm                | Cytoplasm                                 |
| <i>KIN4</i>   | Cytoplasm                | Cytoplasm                                 |
| <i>KIN82</i>  | Cytoplasm                | Cytoplasm                                 |
| <i>KKQ8</i>   | Cytoplasm                | Cytoplasm                                 |
| <i>KNS1</i>   | Cytoplasm (faint)        | Cytoplasm (faint)                         |
| <i>KSP1</i>   | Cytoplasm                | Cytoplasm                                 |
| <i>KSS1</i>   | Cytoplasm                | Nucleus                                   |
| <i>MCK1</i>   | Cytoplasm, Nucleus       | Cytoplasm, Nucleus                        |
| <i>MEC1*</i>  | Cytoplasm                | Cytoplasm                                 |
| <i>MEK1</i>   | Cytoplasm (faint)        | Cytoplasm (faint)                         |
| <i>MKK1</i>   | Cytoplasm                | Cytoplasm                                 |
| <i>MKK2</i>   | Cytoplasm                | Cytoplasm                                 |
| <i>MLP1</i>   | Cytoplasm (faint)        | Cytoplasm (faint)                         |
| <i>MPS1</i>   | Cytoplasm                | Cytoplasm                                 |
| <i>MRK1</i>   | Cytoplasm (faint)        | Cytoplasm (faint)                         |
| <i>NPR1</i>   | Cytoplasm                | Cytoplasm                                 |
| <i>PAK1</i>   | Cytoplasm                | Cytoplasm                                 |
| <i>PBS2</i>   | Cytoplasm                | Cytoplasm                                 |
| <i>PHO85</i>  | Cytoplasm                | Cytoplasm                                 |
| <i>PKC1</i>   | Cytoplasm                | Cytoplasm                                 |
| <i>PKH1</i>   | Cytoplasm                | Cytoplasm                                 |
| <i>PKH2</i>   | Cytoplasm                | Cytoplasm                                 |
| <i>PKH3</i>   | Cytoplasm (faint)        | Cytoplasm (faint)                         |

| <b>Kinase</b> | <b>Vegetative Growth</b> | <b>Filamentous Growth<br/>(1%Butanol)</b> |
|---------------|--------------------------|-------------------------------------------|
| <i>PRR1</i>   | Cytoplasm                | Cytoplasm                                 |
| <i>PRR2</i>   | Cytoplasm                | Cytoplasm                                 |
| <i>PSK1</i>   | Cytoplasm                | Cytoplasm                                 |
| <i>PSK2</i>   | Cytoplasm                | Cytoplasm                                 |
| <i>PTK1</i>   | Cytoplasm (faint)        | Cytoplasm (faint)                         |
| <i>PTK2</i>   | Cytoplasm                | Cytoplasm                                 |
| <i>RAD53</i>  | Nucleus                  | Nucleus                                   |
| <i>RCK1</i>   | Cytoplasm                | Cytoplasm                                 |
| <i>RCK2</i>   | Cytoplasm                | Cytoplasm                                 |
| <i>RIM11</i>  | Cytoplasm                | Cytoplasm                                 |
| <i>RIM15</i>  | Cytoplasm                | Cytoplasm                                 |
| <i>RIO1</i>   | Cytoplasm                | Cytoplasm                                 |
| <i>RIO2</i>   | Cytoplasm                | Cytoplasm                                 |
| <i>SAT4</i>   | Cytoplasm                | Cytoplasm                                 |
| <i>SCH9</i>   | Cytoplasm                | Cytoplasm                                 |
| <i>SGV1</i>   | Cytoplasm, Nucleus       | Cytoplasm, Nucleus                        |
| <i>SKM1</i>   | Cytoplasm (faint)        | Cytoplasm (faint)                         |
| <i>SKS1</i>   | Cytoplasm                | Nucleus                                   |
| <i>SKY1</i>   | Cytoplasm                | Cytoplasm                                 |
| <i>SLN1</i>   | Cytoplasm                | Cytoplasm                                 |
| <i>SLT2</i>   | Cytoplasm, Nucleus       | Cytoplasm, Nucleus                        |
| <i>SMK1</i>   | Cytoplasm (faint)        | Cytoplasm (faint)                         |
| <i>SNF1</i>   | Cytoplasm, Nucleus       | Cytoplasm, Nucleus                        |

| <b>Kinase</b>  | <b>Vegetative Growth</b> | <b>Filamentous Growth<br/>(1%Butanol)</b> |
|----------------|--------------------------|-------------------------------------------|
| <i>SPS1</i>    | Cytoplasm (faint)        | Cytoplasm (faint)                         |
| <i>SSK2</i>    | Cytoplasm                | Cytoplasm                                 |
| <i>SSK22</i>   | Cytoplasm (faint)        | Cytoplasm (faint)                         |
| <i>SSN3</i>    | Cytoplasm, Nucleus       | Cytoplasm, Nucleus                        |
| <i>STE11</i>   | Cytoplasm                | Cytoplasm                                 |
| <i>STE20</i>   | Cytoplasm                | Cytoplasm                                 |
| <i>STE7</i>    | Cytoplasm                | Cytoplasm                                 |
| <i>SWE1</i>    | Cytoplasm                | Cytoplasm                                 |
| <i>TEL1</i>    | Mitochondrion, Cytoplasm | Mitochondrion, Cytoplasm                  |
| <i>TOR1</i>    | Cytoplasm (faint)        | Cytoplasm (faint)                         |
| <i>TOR2*</i>   | Cytoplasm (faint)        | Cytoplasm (faint)                         |
| <i>TOS3</i>    | Cytoplasm                | Cytoplasm                                 |
| <i>TPK1</i>    | Cytoplasm                | Cytoplasm                                 |
| <i>TPK2</i>    | Cytoplasm                | Nucleus                                   |
| <i>TPK3</i>    | Cytoplasm, Nucleus       | Cytoplasm, Nucleus                        |
| <i>VHS1</i>    | Cytoplasm                | Cytoplasm                                 |
| <i>VPS15</i>   | Cytoplasm (faint)        | Cytoplasm (faint)                         |
| <i>VPS34</i>   | Cytoplasm (faint)        | Cytoplasm (faint)                         |
| <i>YAK1</i>    | Cytoplasm, Nucleus       | Cytoplasm, Nucleus                        |
| <i>YBR028C</i> | Cytoplasm                | Cytoplasm                                 |
| <i>YCK1</i>    | Cytoplasm, Nucleus       | Cytoplasm, Nucleus                        |
| <i>YCK2</i>    | Cytoplasm                | Cytoplasm                                 |
| <i>YCK3</i>    | Vacuole                  | Vacuole                                   |

| <b>Kinase</b>  | <b>Vegetative Growth</b> | <b>Filamentous Growth<br/>(1%Butanol)</b> |
|----------------|--------------------------|-------------------------------------------|
| <i>YDL025C</i> | Cytoplasm (faint)        | Cytoplasm (faint)                         |
| <i>YGK3</i>    | Cytoplasm (faint)        | Cytoplasm (faint)                         |
| <i>YGL059W</i> | Cytoplasm (faint)        | Cytoplasm (faint)                         |
| <i>YKL171W</i> | Cytoplasm, Nucleus       | Cytoplasm, Nucleus                        |
| <i>YMR291W</i> | Cytoplasm, Nucleus       | Cytoplasm, Nucleus                        |
| <i>YNR047W</i> | Cytoplasm                | Cytoplasm                                 |
| <i>YPK1</i>    | Cytoplasm                | Cytoplasm                                 |
| <i>YPK2</i>    | Cytoplasm, Nucleus       | Cytoplasm, Nucleus                        |
| <i>YPL141C</i> | Cytoplasm                | Cytoplasm                                 |
| <i>YPL150W</i> | Cytoplasm (faint)        | Cytoplasm (faint)                         |
| <i>YPL236C</i> | Cytoplasm (faint)        | Cytoplasm (faint)                         |

\* Construct in diploid Y825/6
